# Supplementary material
Source: PubMed Central journal article supplement (PMC3318581)
Supplement: supp_32.8.1555_MCB-MCB06154-11-s01.pdf [file supp_32.8.1555_MCB-MCB06154-11-s01.pdf]

**Supplemental File 1. Adipose tissue and body weight** of female *wt/wt*, *P465L/wt*, *ob/ob*, and *P465L/ob* mice. Weight expressed in grams (g)

|                        | WT           | P465L         | OB           | P465L/OBOB    |
|------------------------|--------------|---------------|--------------|---------------|
| <b>Body Weight</b>     | 23.59 ±0.669 | 22.64 ±0.486  | 54.13 ±1.448 | 48.53 ±1.844* |
| <b>Inguinal</b>        | 0.319 ±0.038 | 0.284 ±0.038  | 2.601 ±0.134 | 2.377 ±0.195  |
| <b>Retroperitoneal</b> | 0.124 ±0.020 | 0.057 ±0.008* | 1.317 ±0.082 | 1.304 ±0.143  |
| <b>Mesenteric</b>      | 0.204 ±0.032 | 0.149 ±0.022  | 1.305 ±0.067 | 0.982 ±0.077* |
| <b>Gonadal</b>         | 0.598 ±0.070 | 0.411 ±0.044* | 5.531 ±0.295 | 4.085 ±0.313* |
| <b>Gonadal/BW</b>      | 0.024 ±0.002 | 0.018 ±0.002  | 0.102 ±0.005 | 0.082 ±0.004* |

Data represent means ± SE of 12 animals per group.

\* *wt* vs. *P465L*; Student's *t*-test significance was  $P < 0.05$ .

**Supplemental File 2****Cohort1. Biological characteristics of controls and morbidly obese patients**

|                           | Controls      | MO-LowIR      | MO-HighIR     |
|---------------------------|---------------|---------------|---------------|
| Male/female, n/n          | 3/3           | 7/7           | 7/7           |
| Age, years                | 52.17 ± 5.1   | 44.14 ± 3.43  | 39.00 ± 2.50  |
| Weight, Kg                | 74.00 ± 0.71  | 153.36 ± 7.17 | 157.64 ± 7.48 |
| Height, cm                | 162.60 ± 1.60 | 164.07 ± 2.01 | 167.00 ± 2.98 |
| BMI, Kg/m <sup>2</sup>    | 25.04 ± 0.55  | 56.72 ± 1.71  | 56.30 ± 1.65  |
| Serum insulin, UI/ml      | 11.23 ± 1.58  | 15.42 ± 1.44  | 44.76 ± 3.17  |
| HOMA-IR                   | 3.51 ± 0.48   | 3.60 ± 0.32   | 12.76 ± 1.25  |
| Serum glucose, mmol/l     | 6.03 ± 0.32   | 5.32 ± 0.23   | 6.16 ± 0.29   |
| Serum cholesterol, mmol/l | 4.68 ± 0.40   | 4.91 ± 0.26   | 4.93 ± 0.24   |
| HDL cholesterol, mmol/l   | 0.97 ± 0.23   | 1.16 ± 0.08   | 1.05 ± 0.11   |
| Triglycerides, mmol/l     | 1.08 ± 0.20   | 1.27 ± 0.13   | 1.57 ± 0.25   |

<sup>1</sup> Values are means ± SEM. HDL-c= High density lipoprotein-cholesterol

## Supplemental File 3

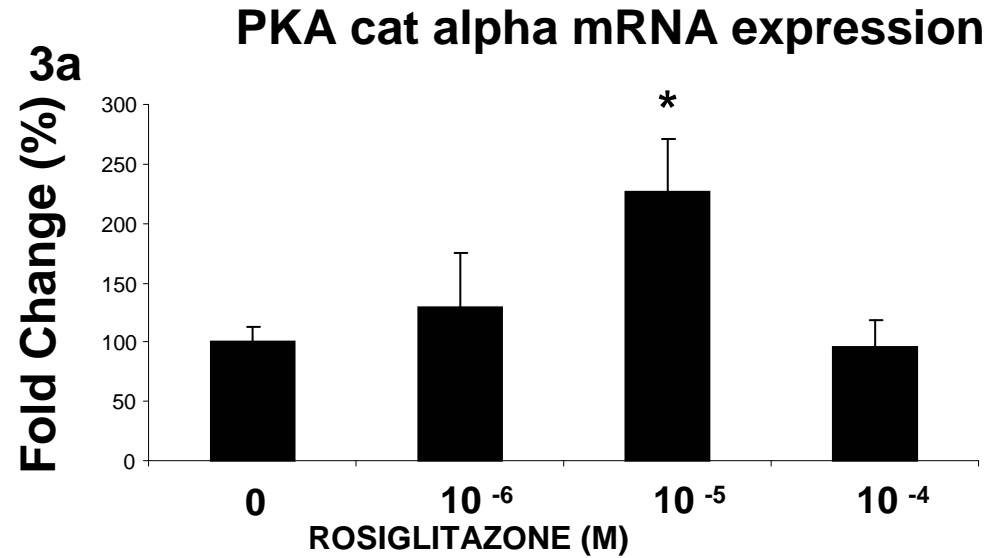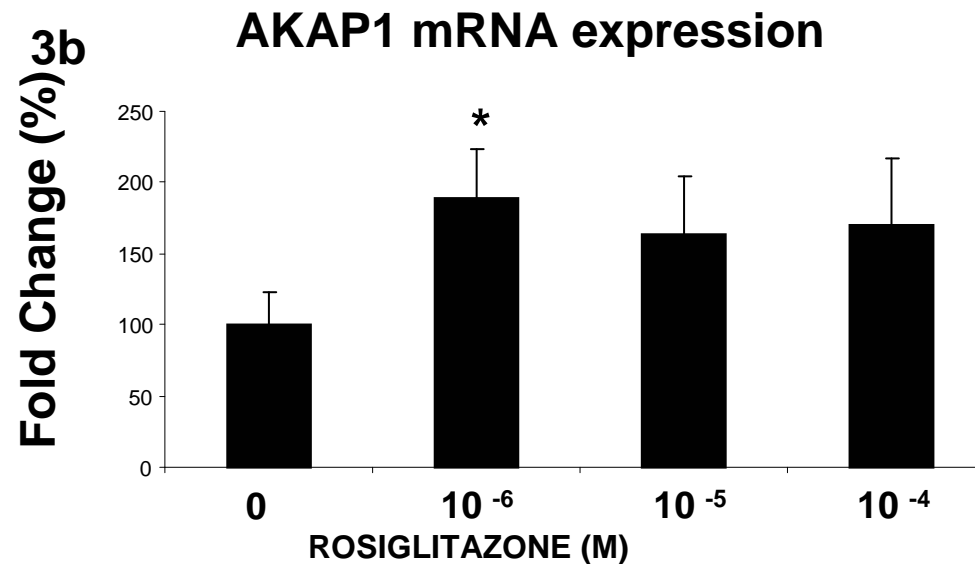

**Ex-vivo experiments using gonadal adipose tissue explants.** Gonadal adipose tissue was obtained from wt mice. 10mg of tissue was incubated in absence or presence of different concentrations of rosiglitazone for 12h. Differences in expression between groups were assessed by student t Test. \* vs. untreated The level of probability was set at  $P < 0.05$ .

## Supplemental File 4

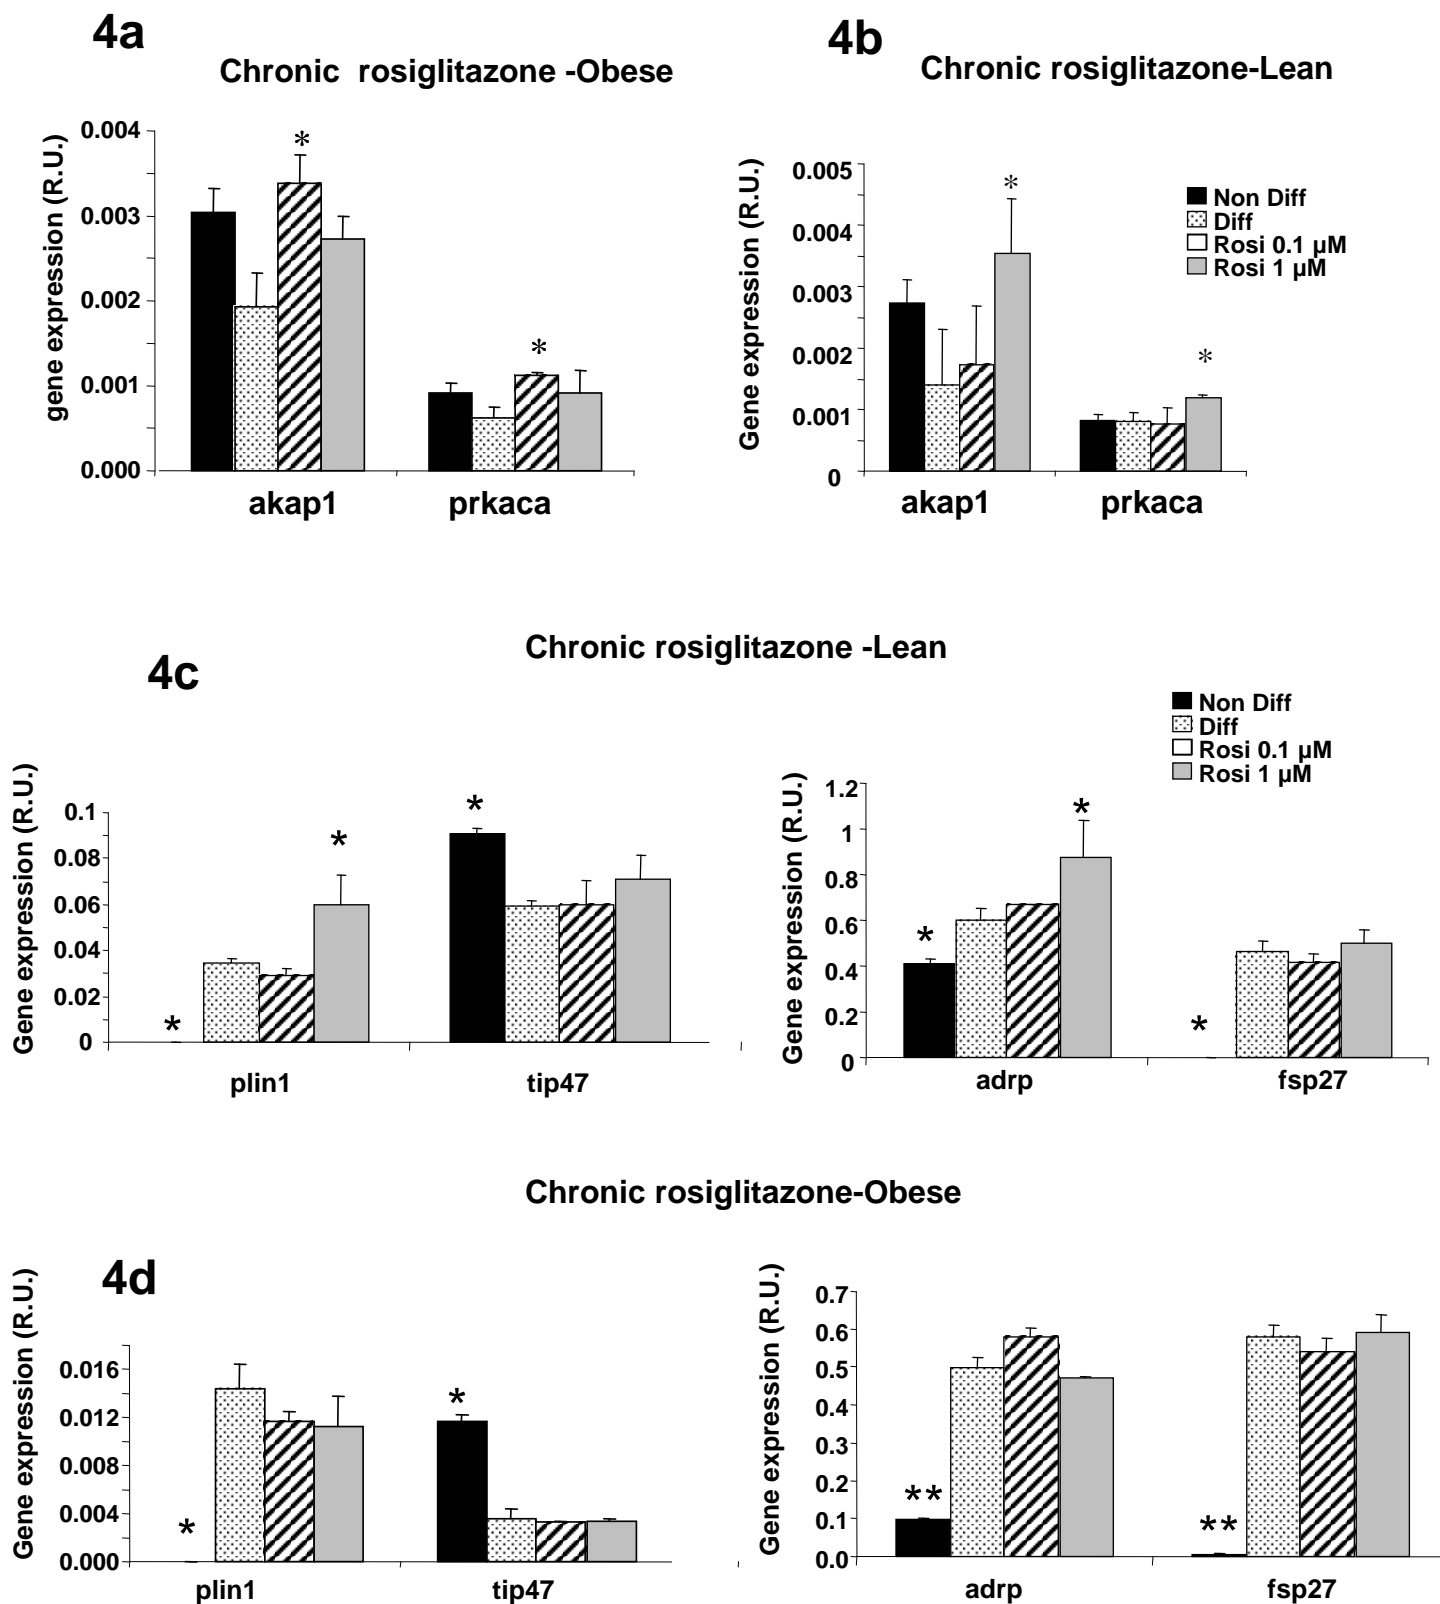

**FIGURE 4. a-d** *prkaca* and *d-akap1* and lipid droplet proteins mRNA expression mRNA expression in adipocytes from lean and obese subjects after chronic exposure to rosiglitazone. Data represent means  $\pm$  SE. Differences in expression between groups were assessed by ANOVA and student t Test. \* differentiated adipocytes. The level of probability was set at \* $p < 0.05$  vs Diff, \*\* $p < 0.005$  vs Diff.

## Supplemental File 5

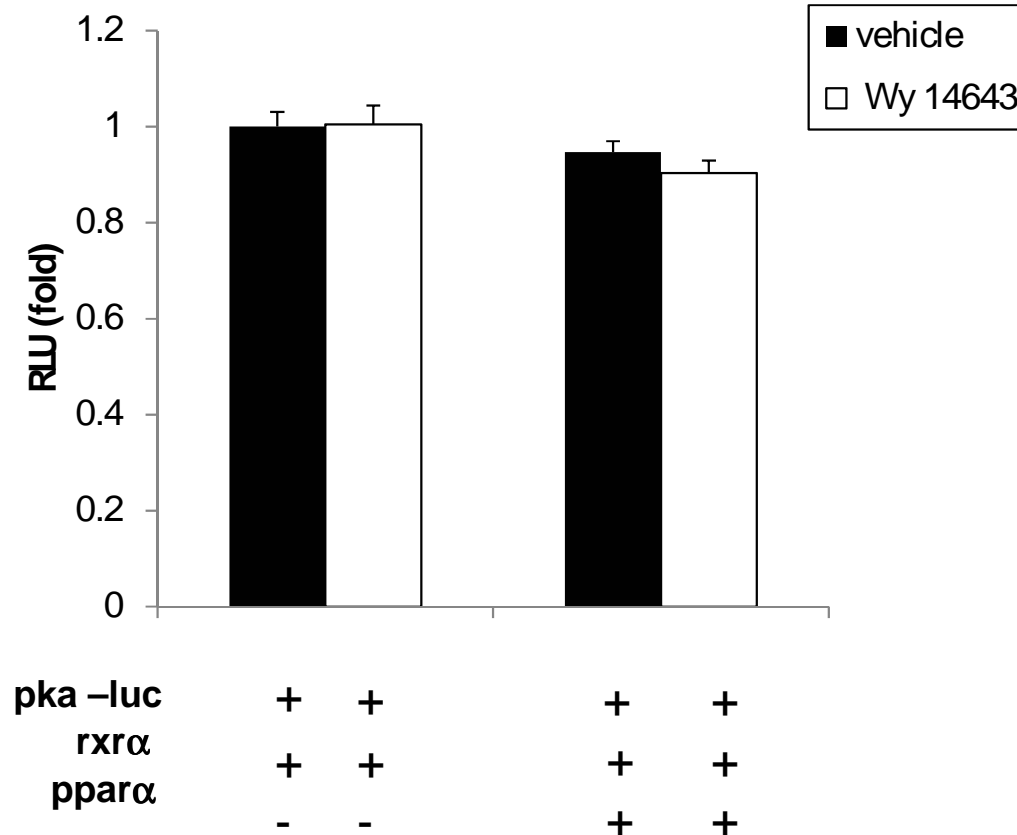

Transactivation of the pka cat subunit promoter-luciferase reporter construct (*pka-Luc*) by PPARalpha in HEK293T cells. The pka-luc reporter plasmid was transiently co-transfected with plasmid expressing RXRa together with Pparalpha. At 24h post-transfection, cells were incubated with 5uM WY14643 (open bar) or vehicle (solid bar) and further incubated for 24h before being harvested and assayed for luciferase activity. Here we shows a representative experiment. Luciferase activity measured in the cells transfected with pka-luc and RxRa and pGS5 as control for Pparalpha (basal condition) in the absence of WY14643 was set at 1.

## Supplemental File 6

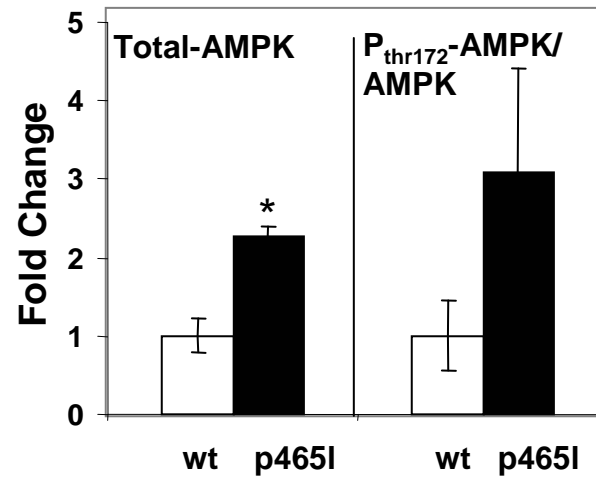

Western blot from isolated mature adipocytes blot. Differences in expression between groups were assessed by student t Test. \* P465L vs. WT The level of probability was set at  $P < 0.05$ .  $n=3$ .

**Supplemental File 7**

**Table I.** Gene expression analysis of P465L mutant adipocytes from lean and obese mice vs. wt counterparts. mRNA levels of different genes determined by real-time PCR of in isolated mature adipocytes from 12-16-week-old wild-type fed a normal diet.

|                                    | <b>WT</b>    | <b>P465L</b>  | <b>ob/ob</b> | <b>P465L/ob/ob</b> | <b>ANOVA</b>  |
|------------------------------------|--------------|---------------|--------------|--------------------|---------------|
| <b>ADRENERGIC PATHWAY</b>          |              |               |              |                    |               |
| β3-AR                              | 100.0 ± 10.9 | 87.5 ± 8.8    | 13.0 ± 3.9°  | 17.2 ± 11.0°       | <b>OB</b>     |
| α2A-AR                             | 100.0 ± 24.8 | 62.1 ± 15.6   | 201.9 ± 67.9 | 66.6 ± 18.4        |               |
| pd3b                               | 100.0 ± 18.9 | 98.8 ± 12.8   | 32.5 ± 5.4°  | 30.8 ± 13.8°       | <b>OB</b>     |
| pd4a                               | 100.0 ± 21.8 | 53.8 ± 6.0*   | 184.5 ± 46.9 | 83.3 ± 27.4        | <b>G, OB</b>  |
| pd4d                               | 100.0 ± 16.8 | 102.4 ± 8.7   | 86.1 ± 19.6  | 52.1 ± 4.3°        | <b>OB</b>     |
| <b>LIPASE INTERACTING PROTEINS</b> |              |               |              |                    |               |
| CGI58/Abdh5                        | 100 ± 12.8   | 81.2 ± 9.3    | 67.1 ± 12.9° | 48.3 ± 9.9°        | <b>OB</b>     |
| FABP4                              | 100 ± 15.7   | 98.5 ± 8.4    | 54.2 ± 9.5°  | 43.2 ± 7.3°        | <b>OB</b>     |
| <b>REESTERIFICATION</b>            |              |               |              |                    |               |
| Pepck                              | 100 ± 28.1   | 39.1 ± 12.7*  | 9.2 ± 1.9°   | 12.2 ± 7.3         | <b>OB</b>     |
| <b>FFA TRANSPORT</b>               |              |               |              |                    |               |
| Cd36                               | 100 ± 19.2   | 55.5 ± 9.7*   | 69.0 ± 11.6  | 56.0 ± 12.2        | <b>G</b>      |
| FATP1                              |              |               |              |                    | <b>G, OB</b>  |
|                                    | 100 ± 20.8   | 39.5 ± 5.1*   | 23.1 ± 3.4°  | 14.6 ± 3.8°        | <b>G x OB</b> |
| LPL                                | 100 ± 16.4   | 85.7 ± 11.8   | 62.2 ± 12.1° | 44.9 ± 8.0°        | <b>OB</b>     |
| <b>PPARGAMMA</b>                   |              |               |              |                    |               |
| Pparγ1                             | 100 ± 13.5   | 99.1 ± 16.9   | 84.4 ± 21.2  | 49.2 ± 11.6°       | <b>OB</b>     |
| Pparγ2                             | 100 ± 35.9   | 235.0 ± 64.1* | 41.6 ± 9.2   | 59.5 ± 22.7°       | <b>G, OB</b>  |

Data represent means ± SE of 8–12 animals per group. Fold changes were established using wt as 100. Differences in expression between groups were assessed by ANOVA (G:effect of P465L mutation, OB: effect of obesity, G x OB: interactive effect) and student t Test. \* P465L vs. WT and ° P465L/ob/ob vs. ob/ob. The level of probability was set at  $P < 0.05$ .
